# Supplementary material
Source: PubMed Central journal article supplement (PMC9014208)

## SUPPLEMENTAL MATERIAL

### **Brd4 is required for chondrocyte differentiation and endochondral ossification**

Christopher R. Paradise, Ph.D.<sup>1,2</sup>, M. Lizeth Galvan, D.D.S.<sup>1</sup>, Oksana Pichurin<sup>1</sup>, M.Sc., Sofia Jerez, Ph.D.<sup>1</sup>, Eva Kubrova, M.D.<sup>1</sup>, S. Sharare Dehghani, M.D.<sup>1</sup>, Margarita E. Carrasco, Ph.D.<sup>1</sup>, Roman Thaler, Ph.D.<sup>1</sup>, A. Noelle Larson<sup>1</sup>, M.D., Andre J. van Wijnen, Ph.D.<sup>3,4\*</sup>, Amel Dudakovic, Ph.D.<sup>1,5\*</sup>

<sup>1</sup>Department of Orthopedic Surgery, Mayo Clinic, Rochester, MN, USA

<sup>2</sup>Center for Regenerative Medicine, Mayo Clinic, Rochester, MN, USA

<sup>3</sup>Department of Biochemistry, University of Vermont, Burlington, VT, USA

<sup>4</sup>Department of Internal Medicine, Erasmus University Medical Center, Rotterdam, Netherlands

<sup>5</sup>Department of Biochemistry and Molecular Biology, Mayo Clinic, Rochester, MN, USA

\*Corresponding authors:

Amel Dudakovic, Ph.D.

Department of Orthopedic Surgery

Mayo Clinic

200 First Street SW

Rochester, MN 55905

Phone: 507-293-0105

Email: [Dudakovic.Amel@mayo.edu](mailto:Dudakovic.Amel@mayo.edu)

Andre J. van Wijnen, Ph.D.

Department of Biochemistry

University of Vermont

89 Beaumont Ave

Burlington, VT 05405

Email: [andre.vanwijnen@uvm.edu](mailto:andre.vanwijnen@uvm.edu)

Running Title: Brd4 and endochondral ossification

**Supplemental Table 1: Primers used in this study.**

| <b>Genotyping Primer Pairs</b>         |                              |                              |
|----------------------------------------|------------------------------|------------------------------|
| <b>Gene</b>                            | <b>Forward Sequence</b>      | <b>Reverse Sequence</b>      |
| Brd4                                   | CCTGTGTGCACTTGCTCCCGAGGAGAGA | GGAACCTCGCTATGTGTAACCA       |
| Cre                                    | TCCAATTTACTGACCGTACACCAA     | GGACTAGAAACCTCCCAAATGTCTACAA |
|                                        |                              |                              |
| <b>DNA Quantification Primer Pairs</b> |                              |                              |
| <b>Gene</b>                            | <b>Forward Sequence</b>      | <b>Reverse Sequence</b>      |
| Brd4 exon 3 v1                         | CTGCCAGTAATGGGGGATGG         | TGCAGTTGGTTTGTCTGTCTCT       |
| Brd4 exon 3 v2                         | GGACACTGGTGGTTAAGAGTTCA      | CCTAGCCATCCTGACCAGTT         |
| Brd4 exon 6                            | AACTCACCCCTTTCCTGCTG         | CAATGATGGGCGGGTGACT          |
|                                        |                              |                              |
| <b>RT-qPCR Primer Pairs</b>            |                              |                              |
| <b>Gene</b>                            | <b>Forward Sequence</b>      | <b>Reverse Sequence</b>      |
| Acan                                   | CCGCTTGCCAGGGGGAGTTG         | GATGATGGGCGCACGCCGTA         |
| Bglap                                  | GCAATAAGGTAGTGAACAGACTCC     | CCATAGATGCGTTTGTAGGCGG       |
| Brd4                                   | GGAGGAAAGAAACAGGGGCA         | GAGTCTGAAGTGGCTGAGGG         |
| Col10a1                                | GGGATGAAGTATTGTGTCTTGGG      | TTCTGCTGCTAATGTTCTTGACC      |
| Col1a1                                 | CCTCAGGGTATTGCTGGACAAC       | CAGAAGGACCTTGTGGCCAGG        |
| Col2a1                                 | GCTGGTGAAGAAGGCAAACGAG       | CCATCTTGACCTGGGAATCCAC       |
| Comp                                   | TGCGAGAACTTCAGGAGACT         | CTGCATTCCGCAAGCATCA          |
| Dcn                                    | GCTCACGCAGTAAAACCTTAG        | TTTCACGACCTTTTAATCCGGG       |
| Gapdh                                  | CATCACTGCCACCCAGAAGACTG      | ATGCCAGTGAGCTTCCCCTTCAG      |
| Hist2h4                                | AAGTTTCTCCGCGACAACATCC       | GTCGCGGATCACATTCTCAAGG       |
| Ibsp                                   | GAATGGCCTGTGCTTTCTCG         | CCGGTACTTAAAGACCCCGTT        |
| Ihh                                    | GCTTTCCTGCCGGAGCCCAG         | GGTGGGGTCCCATCCTCCC          |
| Mki67                                  | CAGAGCTAACTTGCGCTGAC         | ACTACAGGCAGCTGGATACG         |
| Mmp13                                  | CTTCTGGCACACGCTTTTCC         | TGGCTTTTGCCAGTGTAGGT         |
| Runx2                                  | CCTGAACTCTGCACCAAGTCCT       | TCATCTGGCTCAGATAGGAGGG       |
| Sox5                                   | CGCCAGATGAAAGAGCAACTCAG      | TGAGTCAGGCTCTCCAGTGTTG       |
| Sox6                                   | GCATAAGTGACCGTTTTGGCAGG      | GGCATCTTTGCTCCAGGTGACA       |
| Sox9                                   | CACACGTCAAGCGACCCATGAA       | TCTTCTCGCTCTCGTTCAGCAG       |
| Sp7                                    | GGCTTTTCTGCGGCAAGAGGTT       | CGCTGATGTTTGCTCAAGTGGTC      |
| Vegfa                                  | AGAGGCTTGGGGCAGCCGAG         | ACTCCCGGGCTGGTGAGTCC         |

**Supplemental Table 2. Statistical evaluation of chondrogenic differentiation.** For statistical evaluation of the impact of +JQ1 treatment throughout the chondrogenic differentiation time course, a mixed-effects model (REML) analysis was performed for each graph (alpha = 0.05). The p-value reported for the fixed effects was then assessed. For all datasets, the time variable had a statistically significant impact with a p-value < 0.001. The p-value calculated for the “treatment group” variable is reported on each graph. A follow-up multiple comparisons test was performed using the Tukey method (correct for multiple comparisons) to compare the means of each group.

| Gene    | Time variable p-value | Treatment variable p-value | Veh vs. JQ1 1X p-value | Veh vs JQ1 cont. p-value | Veh vs. JQ1 late p-value |
|---------|-----------------------|----------------------------|------------------------|--------------------------|--------------------------|
| Sox5    | < 0.0001              | 0.1506                     | 0.4431                 | 0.1226                   | 0.7881                   |
| Sox6    | < 0.0001              | 0.5107                     | 0.8800                 | 0.4383                   | 0.8612                   |
| Sox9    | < 0.0001              | 0.6933                     | 0.9876                 | 0.6567                   | 0.9781                   |
| Col2a1  | < 0.0001              | 0.9957                     | >0.9999                | 0.9992                   | 0.9981                   |
| Acan    | < 0.0001              | 0.9940                     | 0.9976                 | 0.9945                   | > 0.9999                 |
| Comp    | < 0.0001              | 0.1099                     | 0.7155                 | 0.9931                   | 0.4859                   |
| Runx2   | < 0.0001              | 0.0001                     | 0.4311                 | 0.0003                   | 0.9984                   |
| Sp7     | < 0.0001              | < 0.0001                   | 0.4325                 | 0.0004                   | >0.9999                  |
| Col10a1 | < 0.0001              | 0.0459                     | 0.3330                 | 0.6484                   | 0.5791                   |
| Mmp13   | < 0.0001              | .0107                      | 0.9967                 | 0.0148                   | 0.1873                   |
| Ihh     | < 0.0001              | <0.0001                    | 0.2356                 | <0.0001                  | 0.1945                   |
| Bglap   | < 0.0001              | 0.3301                     | 0.8996                 | 0.9439                   | 0.6232                   |
| Ibsp    | < 0.0001              | <0.0001                    | 0.9262                 | < 0.0001                 | 0.2160                   |

**Supplemental Figure 1. Assessment of bone parameters in 3 week old cKO mice.** Bone parameters were assessed by microcomputed tomography ( $\mu$ CT) analysis of three week old CON ( $Brd4^{wt/wt}; Prrx1-Cre$ ), HET ( $Brd4^{wt/fl}; Prrx1-Cre$ ), and cKO ( $Brd4^{fl/fl}; Prrx1-Cre$ ) female and male mice. The cortical thickness (Ct.Th), trabecular bone volume fraction of total volume (BV/TV), and trabecular total mineral density (TMD) were calculated in the femora of female mice (n = 8 to 9) (**A**). The length, trabecular bone volume to total volume (BV/TV), and trabecular thickness (Tb.Th) of L5 vertebrae of male mice (n = 7 to 9) (**B**). Boxplots indicate the median, interquartile range, and the minimum and maximum value in each dataset. Individual mice are represented by a single point on the graph. P-values shown on the graphs represent the results of a one-way ANOVA followed by a multiple comparisons test performed using the Tukey method (correct for multiple comparisons) to compare the means of the CON and cKO groups.

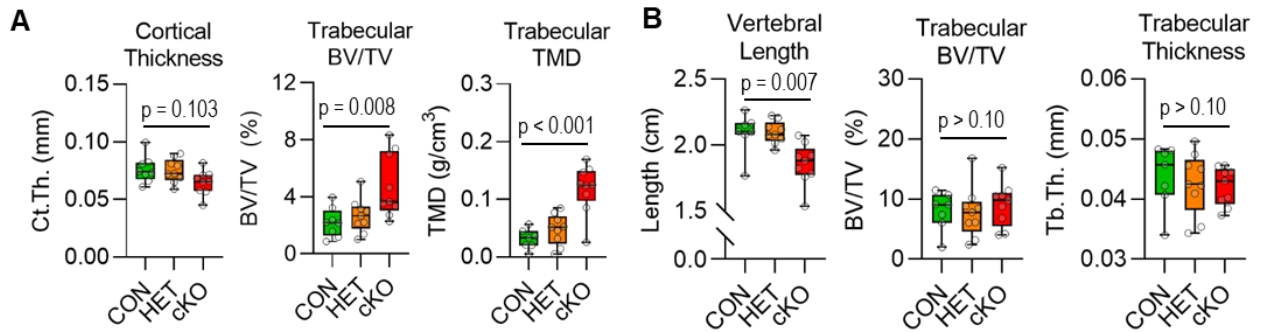

**Supplemental Figure 2. Histologic assessment of Brd4 cKO femora.** Trichrome staining of distal femora derived from one (A) and three (B) week old CON ( $Brd4^{wt/wt}; Prrx1-Cre$ ), HET ( $Brd4^{wt/fl}; Prrx1-Cre$ ), and cKO ( $Brd4^{fl/fl}; Prrx1-Cre$ ) male mice. Data presented in panel A are higher magnification images of data presented in Fig 4F.

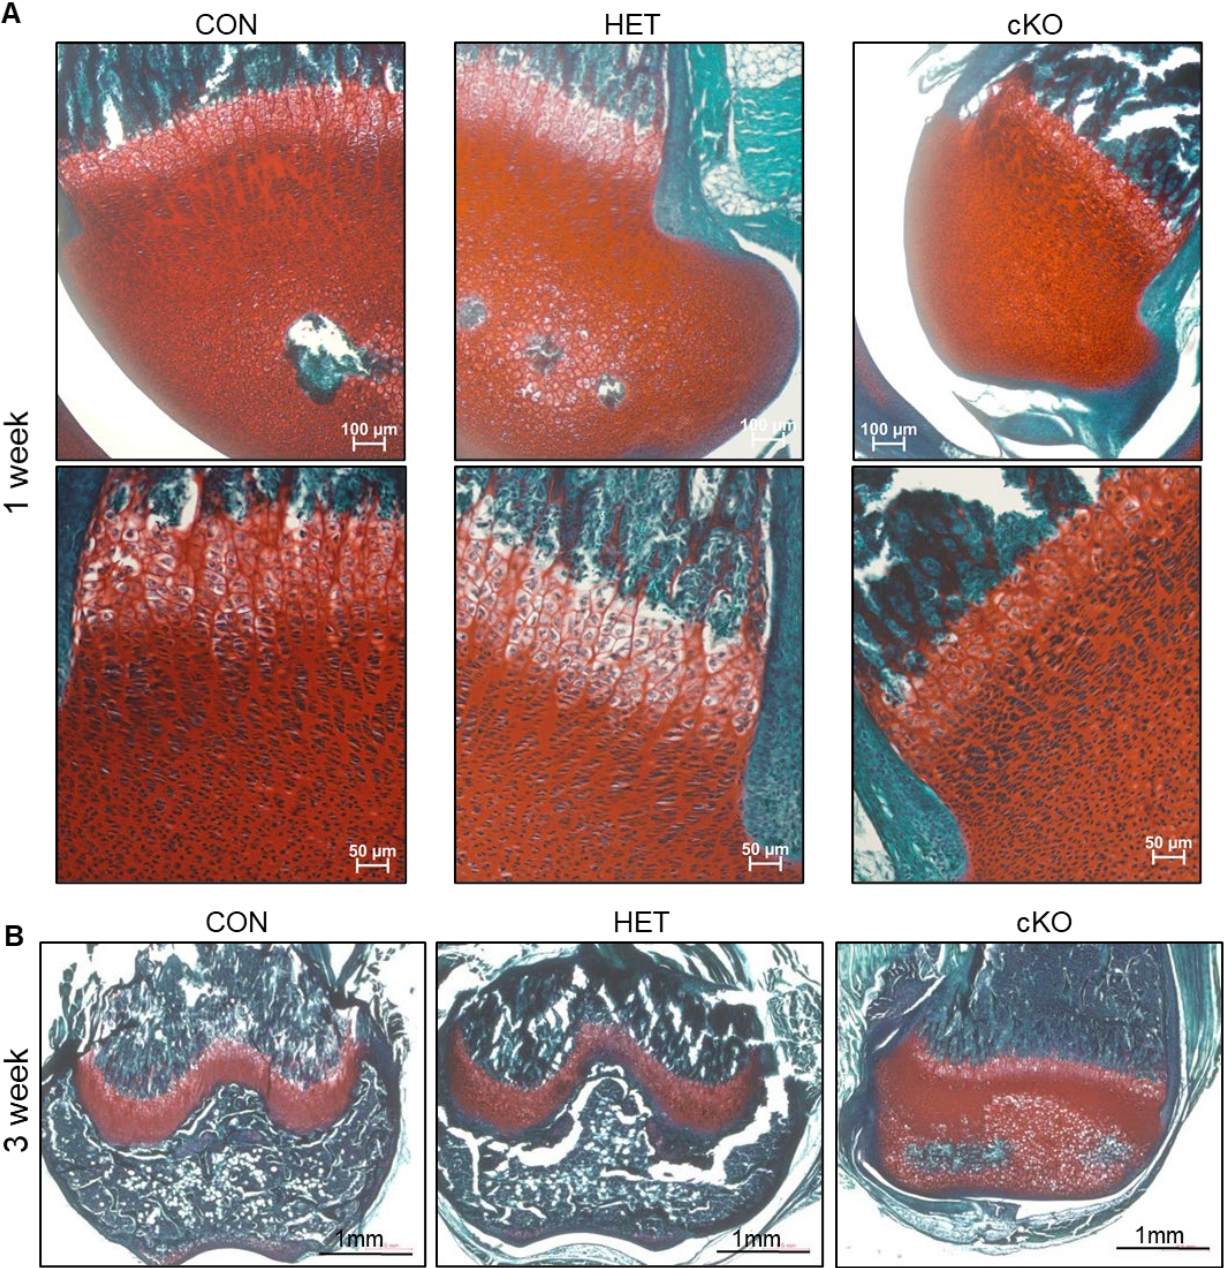

**Supplemental Figure 3. Transcriptional profile of differentiating iMACs.** iMACs were collected from five day-old wild-type C57BL/6J mice and cultured in three-dimensional micromass (3D- $\mu$ mass) conditions in chondrogenic differentiation media. Gene expression was assessed using RNA-sequencing (n = 1) and RT-qPCR (n = 3). RT-qPCR values (mean  $\pm$  standard deviation) were normalized to day four (set at 1). Expression levels of key chondrogenic transcription factors (**A** and **B**), early chondrogenic markers (**C** and **D**), hypertrophic markers (**E** and **F**), and osteogenic markers (**G** and **H**).

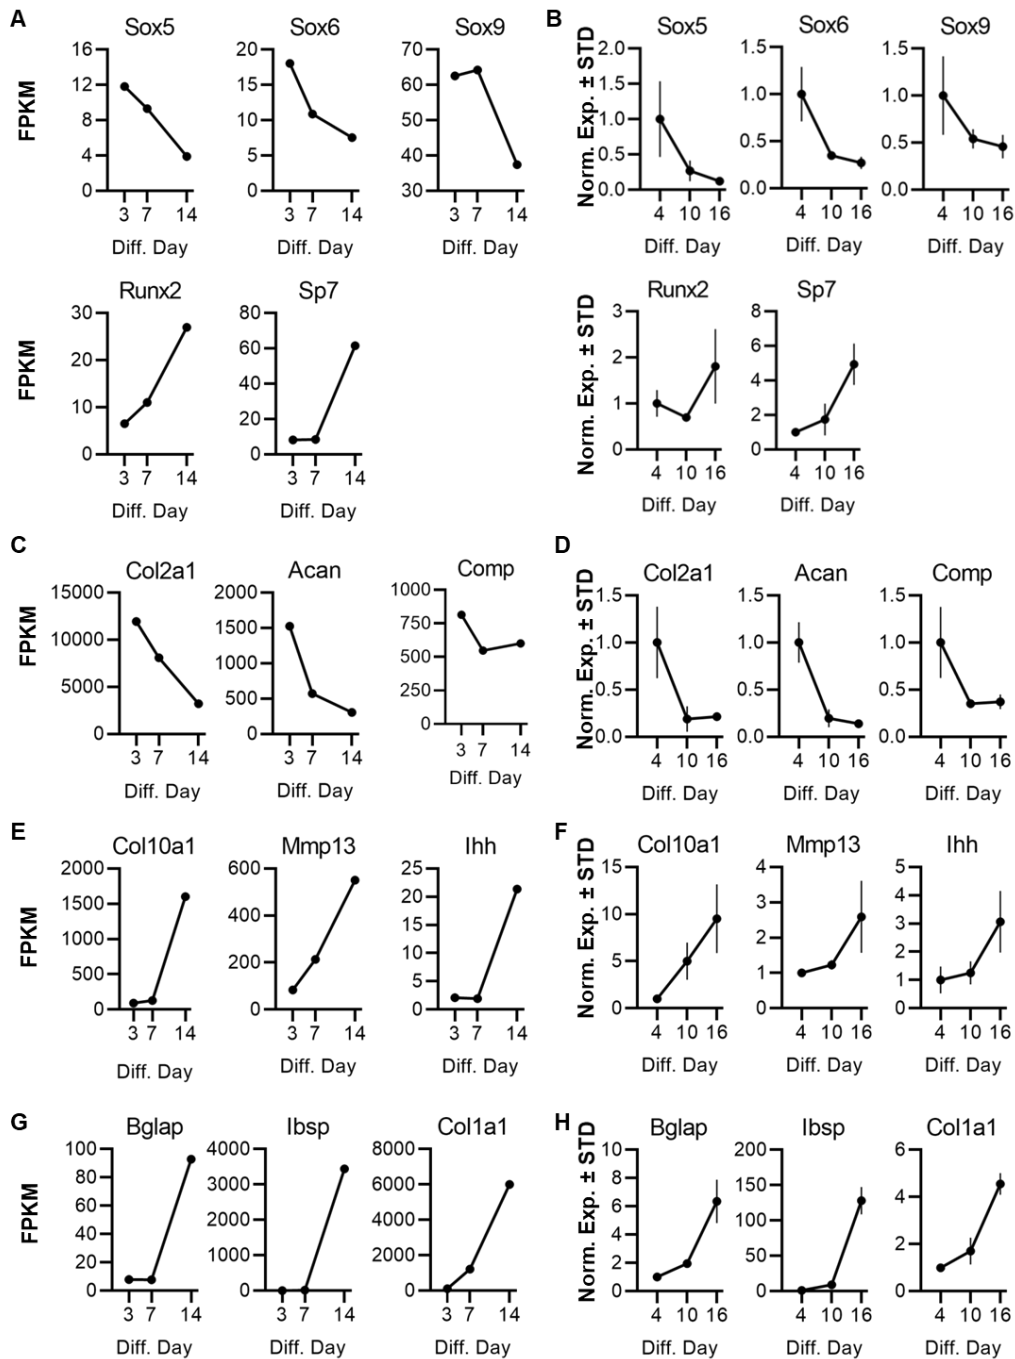

**Original Western Blot Images:**

**Fig. 2B**

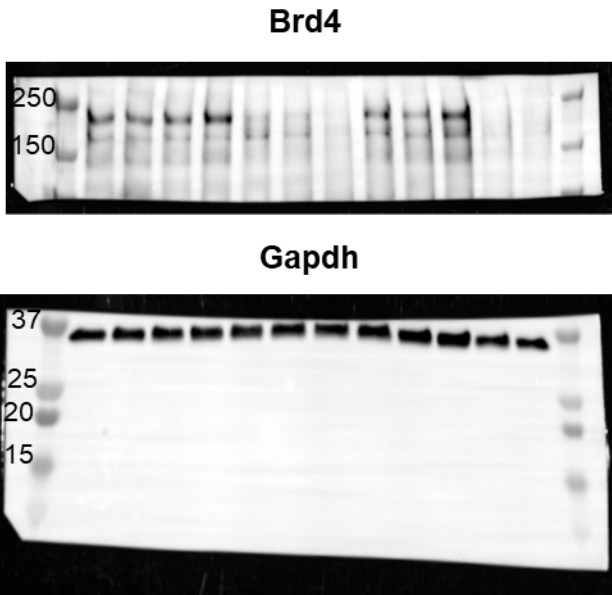

**Figure 6B**

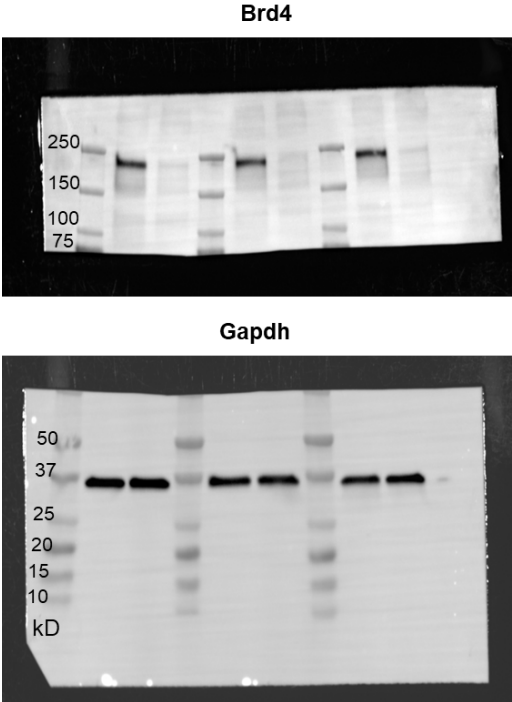

Supplement: NIHMS1753359-supplement-1.pdf [file NIHMS1753359-supplement-1.pdf]
